# Supplementary material
Source: HighWire-hosted journal article supplement (http://mentalhealth.bmj.com/highwire/filestream/68229/field_highwire_adjunct_files/1/74112notes.pdf)
Supplement: 74112notes.pdf [file 74112notes.pdf]

## **Notes**

The number of dropouts from the donepezil and placebo groups was similar from week 13 onwards, with 184 of the 242 allocated donepezil and 183 of the 244 allocated placebo remaining on treatment, institutionalised, or dead at 60 weeks. The 2 and 3 years' results have not been presented (20% completed follow up at 2 years, and 4% at 3 years).
